# Supplementary material for: Ruthenium complexes as inhibitors of human islet amyloid polypeptide aggregation, an effect that prevents beta cell apoptosis
Source: Royal Society of Chemistry journal article supplement (doi:10.1039/c4ra15152f), 2015-01-01
Supplement: c4ra15152f1.pdf [file c4ra15152f1.pdf]

## Supporting information

# Ruthenium complexes as inhibitors of human islet amyloid polypeptide aggregation, an effect that prevents beta cell apoptosis

Lijuan Ma<sup>#</sup>, Yuanting Fu<sup>#</sup>, Lianling Yu, Xiaoling Li<sup>\*</sup>, Wenjie Zheng, Tianfeng Chen<sup>\*</sup>

*Department of Chemistry, Jinan University, Guangzhou 510632, China.*

*E-mail: tchentf@jnu.edu.cn., tlxlli@jnu.edu.cn.*

*<sup>#</sup> These authors contributed equally to the work.*

### 1. Methods.

#### Synthesis and characterization of the Ru complexes.

The Ru complexes were prepared by literature methods with slight changes and the result we got is same as the reported literature<sup>1-5</sup>. here we described a simplified syntfesis method. 1 mmol Hydrated rutrichloride (0.26 g) and 1.5 mmol the diimine ligands (bpy,0.24 g; phen, 0.27 g, pip, 0.43 g, phtpy,0.51 g ) were mixed and stirred for 3 h at 80 °C until the solution colour no longer changed. After that, the solution were added a saturated aqueous NaClO<sub>4</sub> solution, then filtered off and dried in vacuo. The products were then purified by alumina column chromatography with toluene and methanol as eluant.

#### 1.1. NAMI-A (1)

The complex NAMI-A was prepared according to the above procedure and get the same results as the reported literature<sup>1</sup>. Yield 0.645 g, 55.8%.

#### 1.2. [Ru(bpy)<sub>3</sub>](ClO<sub>4</sub>)<sub>2</sub> (2)

The complex [Ru(bpy)<sub>3</sub>](ClO<sub>4</sub>)<sub>2</sub> was prepared according to the above procedure and get the same results as the reported literature<sup>2</sup>. Yield 0.428 g, 75.8%. [Ru(bpy)<sub>3</sub>](ClO<sub>4</sub>)<sub>2</sub> C<sub>30</sub>H<sub>24</sub>Cl<sub>2</sub>N<sub>6</sub>O<sub>8</sub>Ru Anal. Calc. for C<sub>30</sub>H<sub>24</sub>Cl<sub>2</sub>N<sub>6</sub>O<sub>8</sub>Ru :C 46.88, H 3.15,N 10.94. Found: C 46.94, H 3.41, N 10.81%.

#### 1.3 [Ru(pip)<sub>3</sub>](ClO<sub>4</sub>)<sub>2</sub> (3)

The complex  $[\text{Ru}(\text{pip})_3](\text{ClO}_4)_2$  was prepared according to the above procedure and get the same results as the reported literature.<sup>3</sup> Yield 0.422 g, 58.4%. Anal. Calc. for  $\text{C}_{57}\text{H}_{36}\text{Cl}_2\text{N}_{12}\text{O}_8\text{Ru}$ : C, 57.58; H, 3.05; N, 14.14; Ru, 8.50; found (%): C, 57.56; H, 3.06; N, 14.15.

#### 1.4. $[\text{Ru}(\text{phtpy})(\text{phen})\text{Cl}]\text{ClO}_4$ (4)

The complex  $[\text{Ru}(\text{phtpy})(\text{phen})\text{Cl}]\text{ClO}_4$  was prepared according to the above procedure and get the same results as the reported literature<sup>4</sup>. Yield 0.388 g, 42.4%. Anal. Calc. for  $\text{C}_{33}\text{H}_{23}\text{Cl}_2\text{N}_5\text{O}_4\text{Ru}$ : C 54.63, H 3.20, N 9.65. Found: C 54.39, H 3.41, N 9.71%.

## 2. Results

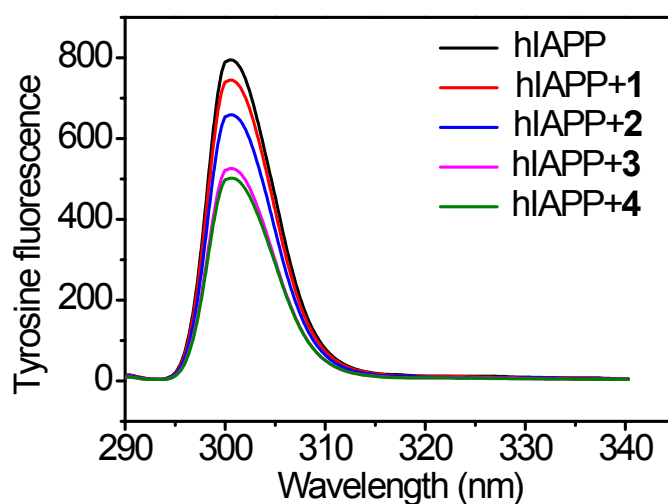

**Figure S1** The Tyrosine fluorescence intensity of 10  $\mu\text{M}$  hIAPP after incubation in the absence or presence of 5  $\mu\text{M}$  Ru complexes in the dark room.

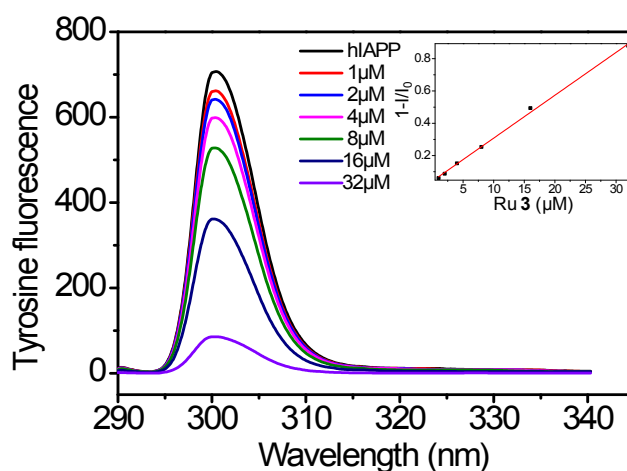

**Figure S2.** Tyrosine fluorescence intensity of hIAPP after incubation in the absence or presence of different concentration of complex 3.

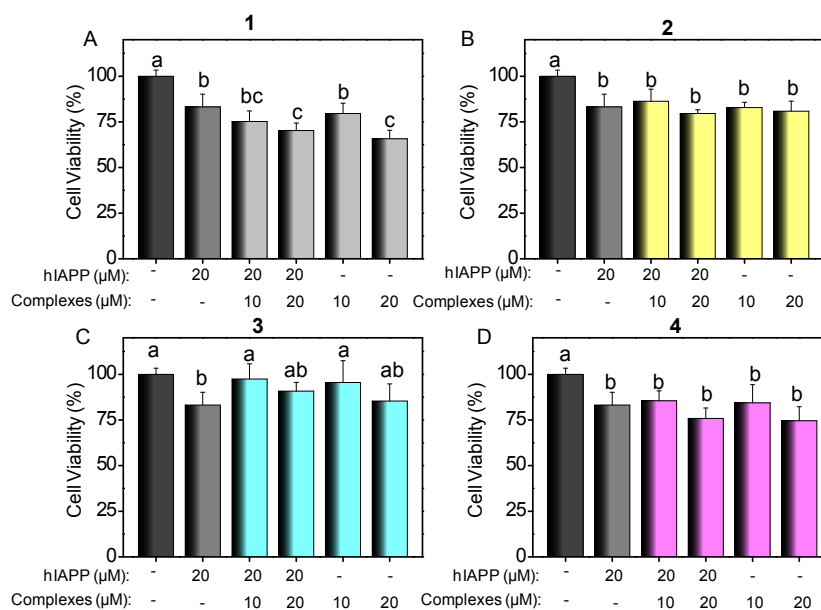

**Figure S3.** Dose-dependent protective effects of Ru complexes against hIAPP. was incubated with different concentrations of complexes **1**(A), **2**(B), **3**(C) and **4**(D) in INS-1 cells at 37 °C for 48 h. Bars with different characters are statistically different at  $P < 0.05$  level as analyzed by one-way ANOVA multiple comparison.

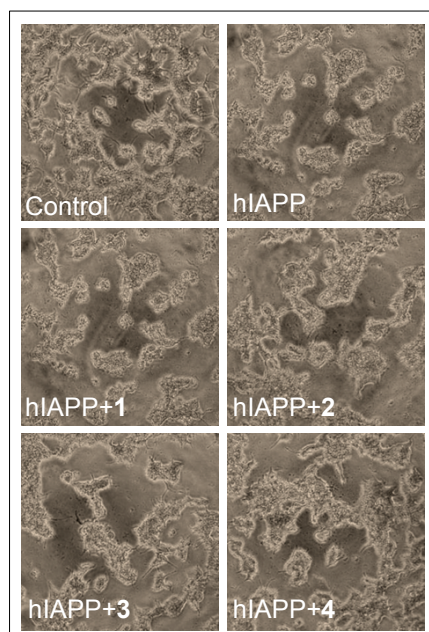

**Figure S4.** Morphological changes induced by hIAPP and the protective effects of Ru complexes. The cells were treated with 20 μM hIAPP in combination with 5 μM Ru complexes **1**, **2**, **3** and **4** at 37 °C for 48 h. Magnification: 100 ×.

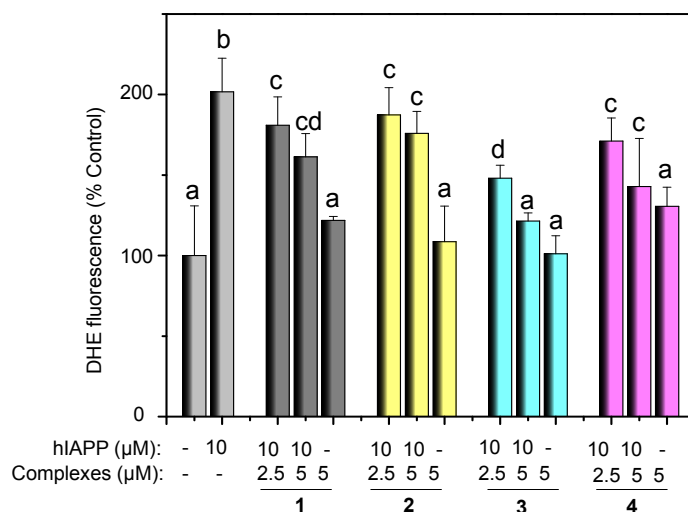

**Figure S5.** Ru complexes reduce ROS generation induced by hIAPP. INS-1 cells were incubated with hIAPP (10 μM) alone or with different Ru complexes (5 μM) at 37 °C for 60 min. Changes in ROS level was determined by DHE fluorescence intensity. The fluorescence intensity of control that treated without hIAPP and Ru complexes was expressed as 100%. The Values represented were means ±SD from three independent experiments. Bars with different characters are statistically different at  $P < 0.05$  level as analyzed by one-way ANOVA multiple comparison.

## References

1. A. H. Velders, A. Bergamo, E. Alessio, E. Zangrando, J. G. Haasnoot, C. Casarsa, M. Cocchietto, S. Zorzet and G. Sava, *J. Med.Chem.*, 2004, 47, 1110-1121.
2. M. Biner, H. Buergi, A. Ludi and C. Röhr, *J. Am. Chem. Soc.*, 1992, 114, 5197-5203.
3. C.-W. Jiang, H. Chao, R.-H. Li, H. Li and L.-N. Ji, *Transition Met. Chem.*, 2002, 27, 520-525.
4. B.-w. Jing, W.-q. Wang, M.-h. Zhang and T. Shen, *Dyes Pigments*, 1998, 37, 177-186.
5. Z. Luo, L. Yu, F. Yang, Z. Zhao, B. Yu, H. Lai, K.-H. Wong, S.-M. Ngai, W. Zheng and T. Chen, *Metallomics*, 2014.
